# Supplementary material for: Electronic structure and magnetic properties of the graphene/Fe/Ni(111) intercalation-like system
Source: Royal Society of Chemistry journal article supplement (doi:10.1039/c1cp00014d), 2011-01-01
Supplement: c1cp00014d.pdf [file c1cp00014d.pdf]

Supplementary material for manuscript:

# **Electronic structure and magnetic properties of the graphene/Fe/Ni(111) intercalation-like system**

M. Weser,<sup>1</sup> E. N. Voloshina,<sup>2</sup> K. Horn,<sup>1</sup> and Yu. S. Dedkov<sup>1</sup>

<sup>1</sup>Fritz-Haber Institut der Max-Planck Gesellschaft, 14195 Berlin, Germany

<sup>2</sup>Institut für Chemie und Biochemie-Physikalische und Theoretische Chemie, Freie Universität Berlin, Takustraße 3, 14195 Berlin, Germany

## **List of tables:**

Table 1: Parameters for the calculated atomic structures of graphene/Ni(111) and graphene/1 ML Fe(111)/Ni(111).

Table 2: Binding energies of the interface states for stable crystallographic structures of graphene/Ni(111) and graphene/1 ML Fe(111)/Ni(111).

## **List of figures:**

Fig.S1: Electronic structures of graphene/Ni(111) and graphene/1 ML Fe(111)/Ni(111) in the wide energy range ( $E - E_F : -21... + 5$  eV).

Fig.S2: Electronic structures of graphene/Ni(111) around  $E_F$  with the corresponding weights of Ni- and C-projected bands.

Fig.S3: Electronic structures of 1 ML Fe(111)/Ni(111) [for crystallographic structure see Fig.1(c)] around  $E_F$  with the corresponding weights of Ni-projected bands.

Fig.S4: Electronic structures of 1 ML Fe(111)/Ni(111) [for crystallographic structure see Fig.1(c)] around  $E_F$  with the corresponding weights of Fe-projected bands.

Fig.S5: Electronic structures of graphene/1 ML Fe(111)/Ni(111) around  $E_F$  with the corresponding weights of Fe- and C-projected bands.

TABLE I: Results for the atomic structure of the three graphene/FM interface models and for the clean FM surface:  $d_0$  is the distance between the graphene overlayer and the interface FM layer (the two values for the two nonequivalent carbon atoms are indicated);  $d_1$  is the distance between the interface FM layer and the second FM layer;  $d_2$  is the distance between the second and third FM layers;  $\Delta E$  is the energy difference between the energy calculated for the different slabs and the energy calculated for the most stable geometry;  $m_{\text{FM}}$  is the interface/surface FM spin magnetic moment (the two values for the  $sp$  and  $d$  magnetizations are indicated);  $m_{\text{C}}$  is the interface carbon spin magnetic moment (the two values for the two nonequivalent carbon atoms are indicated).

|                             | FM             | Structure of the graphene/FM interface |                |                |
|-----------------------------|----------------|----------------------------------------|----------------|----------------|
|                             | Ni(111)        | <i>top-fcc</i>                         | <i>top-hcp</i> | <i>fcc-hcp</i> |
| $d_0$ (Å)                   |                | 2.135/2.133                            | 2.145/2.146    | 3.540/3.540    |
| $d_1$ (Å)                   | 2.005          | 2.020                                  | 2.020          | 2.020          |
| $d_2$ (Å)                   | 2.031          | 2.017                                  | 2.015          | 2.036          |
| $\Delta E$ (eV)             |                | 0.000                                  | 0.049          | 0.054          |
| $m_{\text{FM}}$ ( $\mu_B$ ) | -0.030/0.710   | -0.025/0.543                           | -0.026/0.514   | -0.029/0.669   |
| $m_{\text{C}}$ ( $\mu_B$ )  |                | -0.019/0.031                           | -0.019/0.027   | 0.000/0.000    |
|                             | 1ML Fe/Ni(111) | <i>TOP-FCC</i>                         | <i>TOP-HCP</i> | <i>FCC-HCP</i> |
|                             |                |                                        |                |                |
| $d_0$ (Å)                   |                | 2.117/2.092                            | 2.114/2.089    | 3.487/3.487    |
| $d_1$ (Å)                   | 2.039          | 2.029                                  | 2.019          | 2.028          |
| $d_2$ (Å)                   | 2.061          | 2.044                                  | 2.057          | 2.062          |
| $\Delta E$ (eV)             |                | 0.021                                  | 0.000          | 0.104          |
| $m_{\text{FM}}$ ( $\mu_B$ ) | -0.028/2.622   | -0.034/2.486                           | -0.035/2.469   | -0.022/2.616   |
| $m_{\text{C}}$ ( $\mu_B$ )  |                | -0.048/0.040                           | -0.050/0.039   | 0.000/0.000    |

TABLE II: Binding energies (in eV) (positive sign for states below the Fermi level and negative sign for states above the Fermi level) of the interface hybrid states ( $I_i$ ) extracted from the calculated band structures of the graphene/FM system at the K and M points (see text for details).

| State | FM = Ni(111)    |                   | FM = 1ML Fe/Ni(111) |                   |
|-------|-----------------|-------------------|---------------------|-------------------|
|       | spin $\uparrow$ | spin $\downarrow$ | spin $\uparrow$     | spin $\downarrow$ |
| $I_5$ | -3.20           | -3.32             | -3.56               | -4.05             |
| $I_4$ | -0.12           | -0.55             | -0.28               | -1.72             |
| $I_3$ | 0.28            | -0.16             | 0.26                | -1.19             |
| $I_2$ | 2.28            | 1.93              | 2.32                | 1.99              |
| $I_1$ | 3.27            | 2.93              | 3.75                | 2.77              |

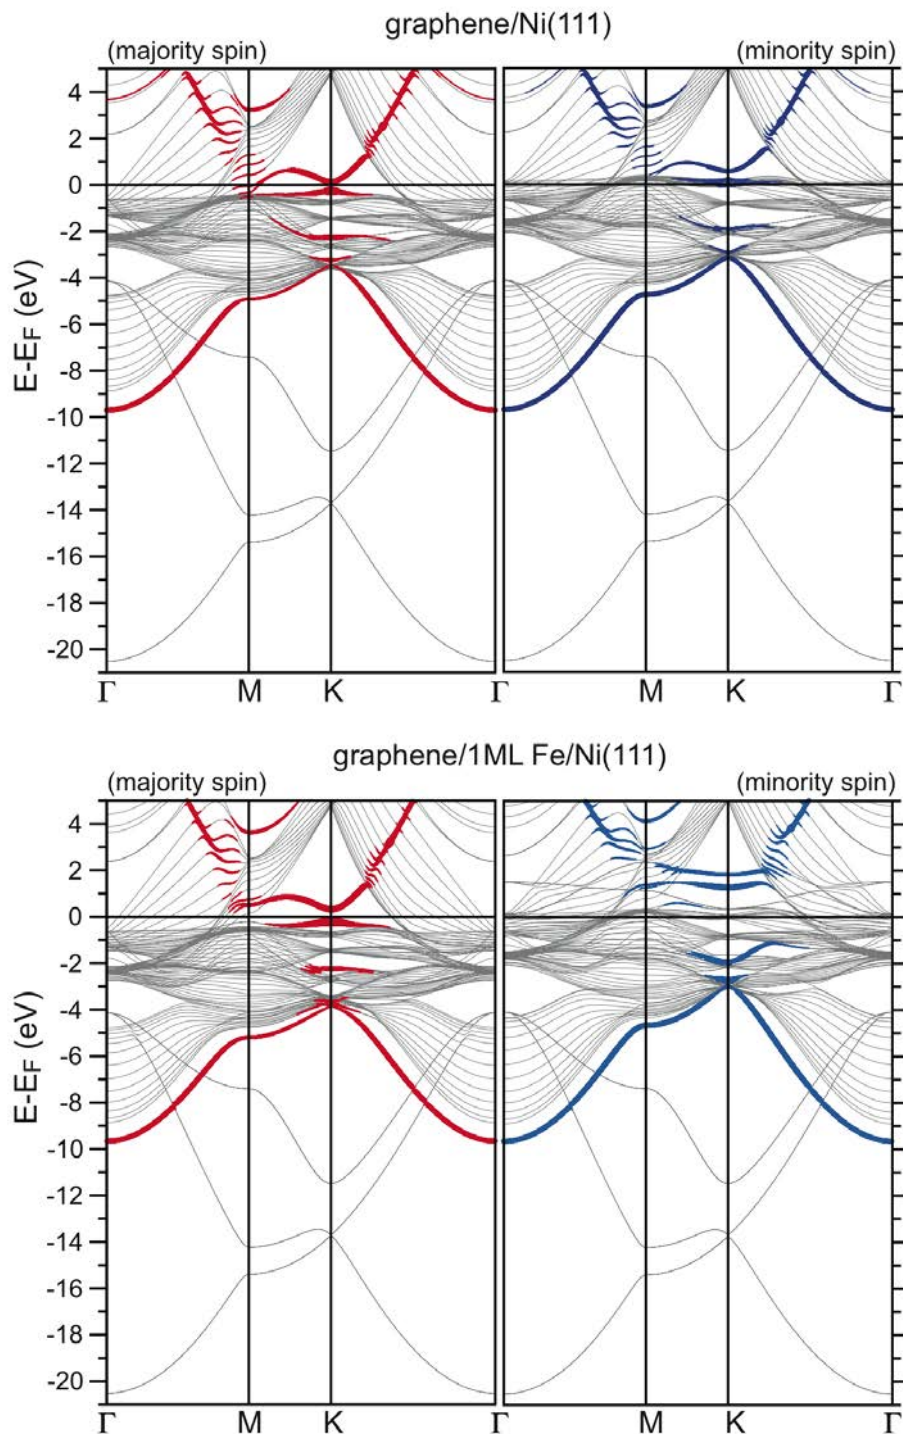

**Fig. S1.** Calculated majority and minority spin band structures of the graphene/Ni(111) and graphene/1 ML Fe(111)/Ni(111) interfaces for a most energetically favorable configuration. For the blue/red (thicker) lines, the carbon  $p_z$  character is used as a weighting factor.

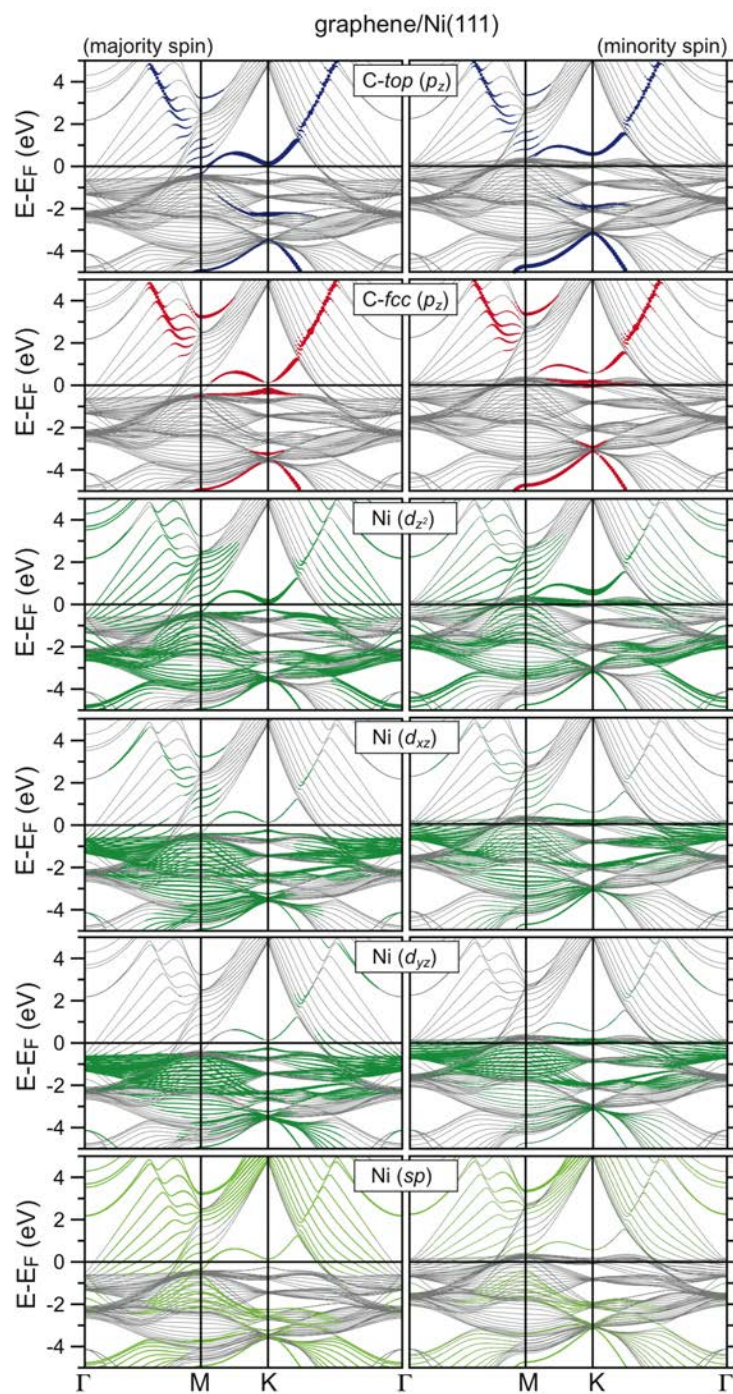

**Fig. S2.** Detailed analysis of the electronic structure of the graphene/Ni(111) system where the corresponding weights of Ni- and C-projected bands are shown by thick lines.



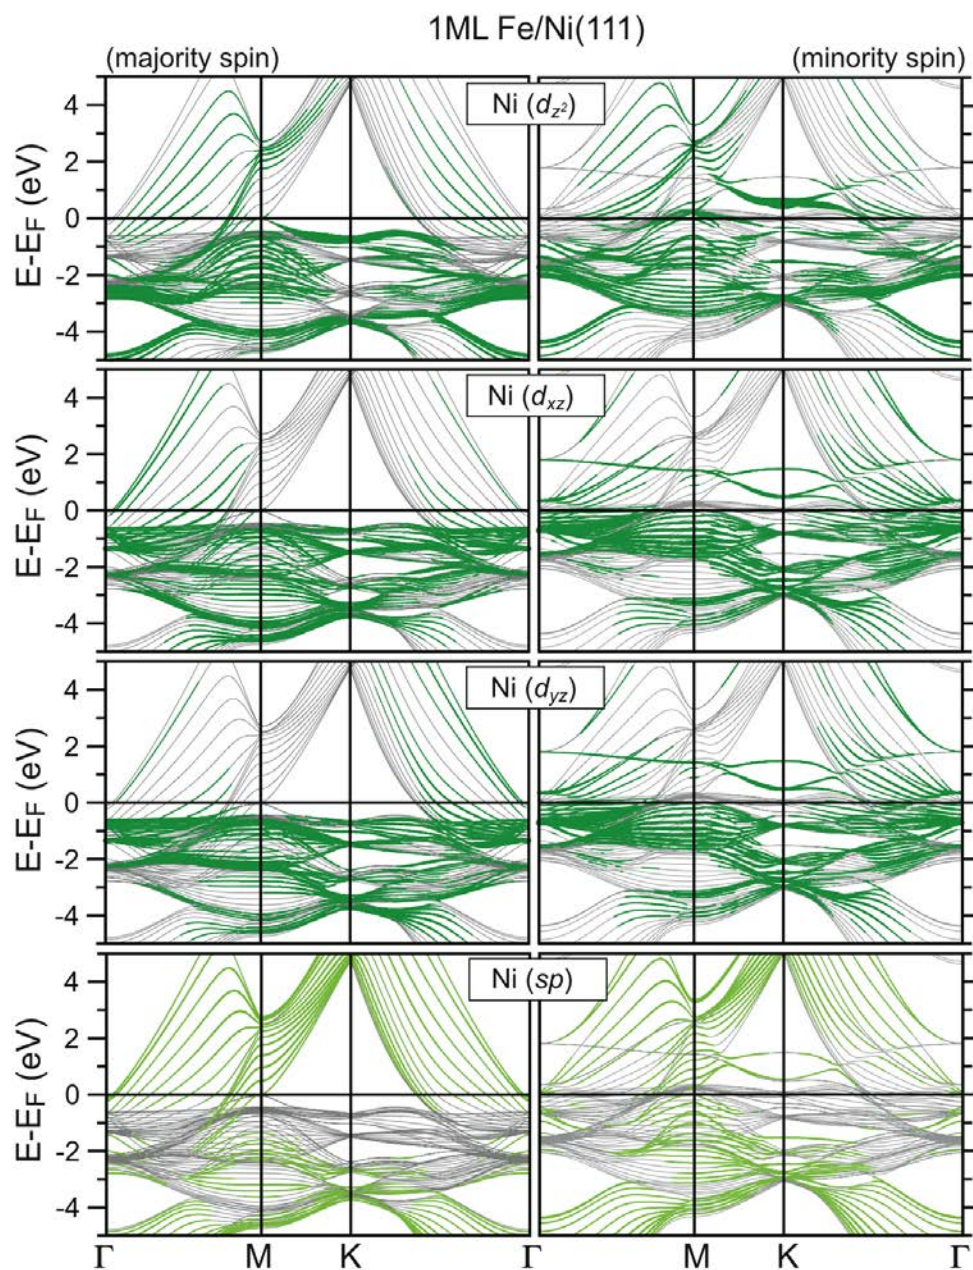

**Fig. S3.** Detailed analysis of the electronic structure of the 1 ML Fe/Ni(111) system where the corresponding weights of Ni-projected bands are shown by thick lines.

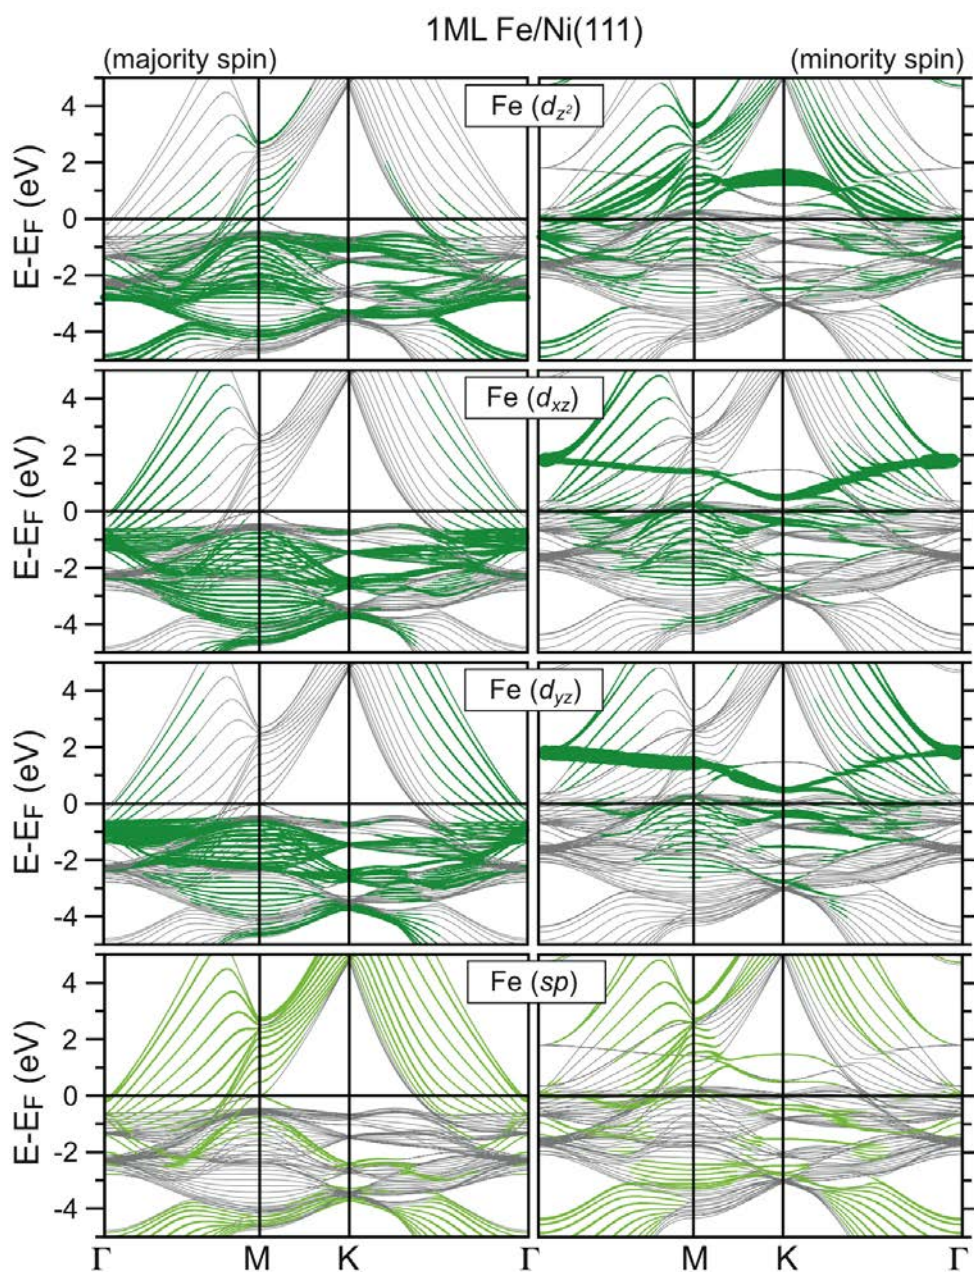

**Fig. S4.** Detailed analysis of the electronic structure of the 1ML Fe/Ni(111) system where the corresponding weights of Fe-projected bands are shown by thick lines.



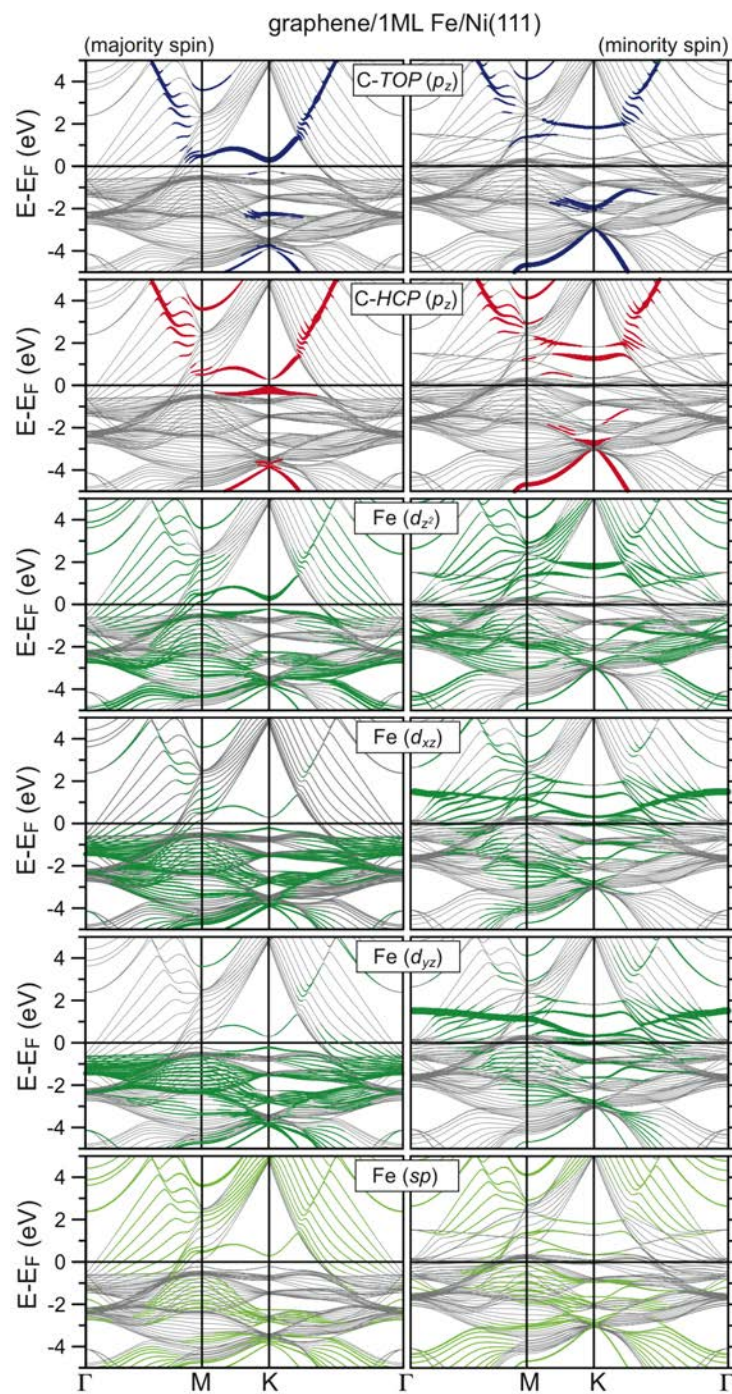

**Fig. S5.** Detailed analysis of the electronic structure of the graphene/1 ML Fe(111)/Ni(111) system where the corresponding weights of Fe- and C-projected bands are shown by thick lines.
